# Supplementary material for: Efficient production of ethylene glycol from cellulose over Co@C catalysts combined with tungstic acid
Source: Royal Society of Chemistry journal article supplement (doi:10.1039/d2se00386d), 2022-01-01
Supplement: d2se00386d1.pdf [file d2se00386d1.pdf]

## Efficient production of ethylene glycol from cellulose over Co@C catalysts combined with tungstic acid

Haosheng Xin<sup>a,b,c,d</sup>, Haiyong Wang<sup>a,b,c</sup>, Song Li <sup>a,b,c</sup>, Xiaohong Hu<sup>a,b,c,d</sup>, Chenguang Wang <sup>a,b,c</sup>, Longlong Ma<sup>b,c</sup>, Qiying Liu<sup>a,b,c</sup> \*

<sup>a</sup> Guangzhou Institute of Energy Conversion, Chinese Academy of Sciences, Guangzhou 510640, P. R. China

<sup>b</sup> CAS Key Laboratory of Renewable Energy, Guangzhou 510640, P. R. China

<sup>c</sup> Guangdong Provincial Key Laboratory of New and Renewable Energy Research and Development, Guangzhou 510640, P. R. China

<sup>d</sup> University of Chinese Academy of Sciences, Beijing 100049, P. R. China

\*Corresponding author. Email: liuqy@ms.giec.ac.cn

Fax: +86-20-8705-7673; Tel: +86-20-3702-9721

**Figure S1.** TG-MS analysis of Co-CA precursor

**Table S1.** Comparison of catalytic performance over various catalysts for the production of EG from cellulose

**Table S2.** Influence of reaction temperature of Co@C catalyst combined with TA on the yield of main gas products in cellulose conversion

**Figure S2.** Raman spectrum of Co@C-700-3h catalyst

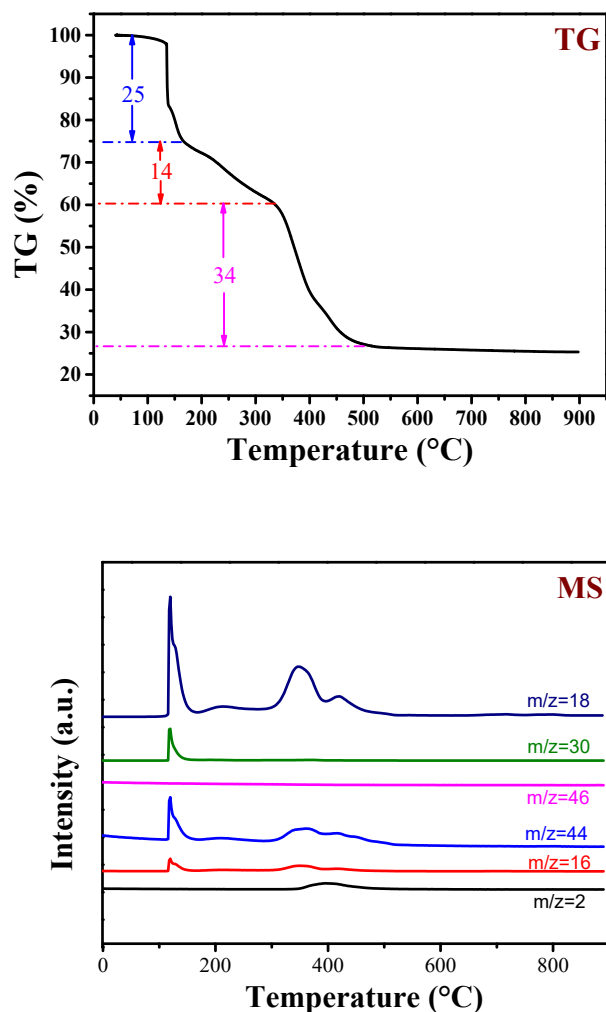

**Figure S1.** TG-MS analysis of Co-CA precursor

The experiment was conducted at the heating rate of 10 °C/min under 100 ml/min N<sub>2</sub> flow. The outlet gases from the decomposition was monitored by H<sub>2</sub> (m/z=2), CH<sub>4</sub> (m/z=16), H<sub>2</sub>O (m/z=18), NO (m/z=30), CO<sub>2</sub>/N<sub>2</sub>O (m/z=44), and NO<sub>2</sub> (m/z=46). Three main weight losses of about 25%, 14% and 34% were observed in the range of 150 °C-170 °C, 170 °C-350 °C and 350 °C-500 °C during the decomposition, respectively. Based on the MS measurements, the weight losses were ascribed to the release of NO and/or N<sub>2</sub>O decomposed from NO<sub>3</sub><sup>-</sup> residue and CH<sub>4</sub>, H<sub>2</sub>O, and CO<sub>2</sub> from citric acid moiety in Co-CA, respectively. And those gases could promote the reduction of Co<sup>2+</sup> to zero-valent Co as auxiliary reducing agents during the carbonization process of Co-CA.

**Table S1** Comparison of catalytic performance over various catalysts for the production of EG from cellulose

| Entry | Catalyst                     | Conditions              | EG yield (C-mol %) | Reference        |
|-------|------------------------------|-------------------------|--------------------|------------------|
| 1     | Ru/MC+TA                     | 245°C,<br>6 MPa         | 50.9               | 1                |
| 2     | Ni-W <sub>2</sub> C/AC       | 240°C,<br>6 MPa         | 53.2               | 2                |
| 3     | AMT-Ru/AC                    | 240°C,<br>5 MPa         | 46.7               | 3                |
| 4     | Ru/C+PTA/ZrO <sub>2</sub>    | 220°C,<br>5 MPa         | 40.0               | 4                |
| 5     | Raney Ni+TA                  | 245°C,<br>6 MPa         | 56.6               | 5                |
| 6     | Ni-W/MIL-125 (Ti)            | 245°C,<br>4 MPa         | 68.7               | 6                |
| 7     | Al-WO <sub>3</sub> -Ni-TUD-1 | 230°C,<br>4 MPa         | 66.2               | 7                |
| 8     | Cu-WO <sub>x</sub> /AC+Ni/AC | 245°C,<br>4 MPa         | 58.0               | 8                |
| 9     | <b>Co@C+TA</b>               | <b>240°C,<br/>3 MPa</b> | <b>67.3</b>        | <b>This work</b> |

**Table S2** Influence of reaction temperature of Co@C catalyst combined with TA on the yield of main gas products in cellulose conversion

| Entry | Temperature (°C) | Gas phase yield (C-mol%) | Products selectivity (%) |                                            |
|-------|------------------|--------------------------|--------------------------|--------------------------------------------|
|       |                  |                          | CH <sub>4</sub>          | C <sub>2</sub> -C <sub>5</sub> hydrocarbon |
| 1     | 230              | 1.16                     | 64.7                     | 8.1                                        |
| 2     | 240              | 1.53                     | 82.3                     | 17.7                                       |
| 3     | 250              | 1.29                     | 79.1                     | 20.9                                       |

Reaction conditions: 0.2 g cellulose, Co@CA-700-3h (30 mg), TA (80mg), 20ml DW, 3.0 MPa H<sub>2</sub>, 3 h.

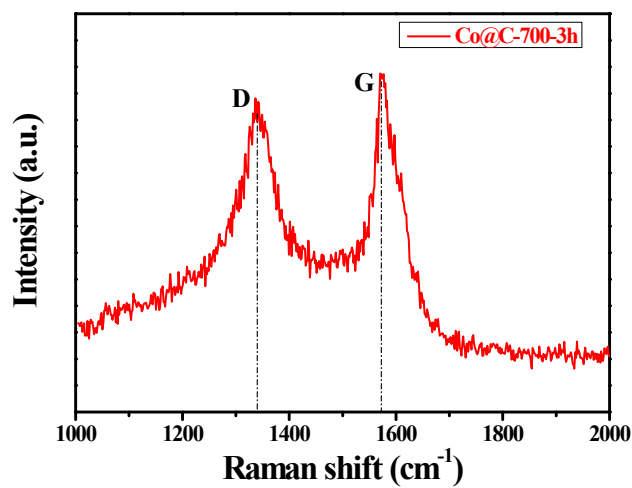

**Figure S2.** Raman spectrum of Co@C-700-3h catalyst

## References

1. Z. Tai, J. Zhang, A. Wang, M. Zheng and T. Zhang, *Chem Commun.*, 2012, **48**, 7052-7054.
2. N. Ji, T. Zhang, M. Zheng, A. Wang, H. Wang, X. Wang and J. G. Chen, *Angew. Chem. Int. Ed.*, 2008, **47**, 8510-8513.
3. G. Zhao, M. Zheng, J. Zhang, A. Wang and T. Zhang, *Ind. Eng. Chem. Res.*, 2013, **52**, 9566-9572.
4. A. R. Mankar, A. Modak and K. K. Pant, *Fuel Process. Technol.*, 2021, **218**, 106847
5. Z. Tai, J. Zhang, A. Wang, J. Pang, M. Zheng and T. Zhang, *ChemSusChem*, 2013, **6**, 652-658.
6. N. Li, X. Liu, J. Zhou, Q. Ma, M. Liu and W. Chen, *ACS Sustain. Chem. Eng.*, 2020, **8**, 9650-9659.
7. M. S. Hamdy, M. A. Eissa and S. M. A. S. Keshk, *Green Chem.*, 2017, **19**, 5144-5151.
8. D. Chu and C. Zhao, *Catal. Today*, 2020, **351**, 125-132.
